# Supplementary material for: Slow fusion pore expansion creates a unique reaction chamber for co-packaged cargo
Source: PubMed Central journal article supplement — J Gen Physiol. 2017 Oct 2;149(10):921–34. doi: 10.1085/jgp.201711842 (PMC5694939; doi:10.1085/jgp.201711842), 2017-10-02
Supplement: JGP_201711842_sm.pdf [file JGP_201711842_sm.pdf]

## SUPPLEMENTAL MATERIAL

Bohannon et al., <https://doi.org/10.1083/jgp.201711842>

### Supplemental methods

#### gBlock molecular biology

Constructs were made by inserting custom oligonucleotides from IDT into either pcDNA3.1 or ppHluorin-N1 (ppHI-N1) into restriction sites as indicated. Consensus human coding sequences were obtained from listed accession numbers.

#### gBlock sequence to clone human tPA into ppHI-N1 (accession no. NM\_000930.4)

Design notes: (1) Adds tPA CDS between HindIII and BamHI sites in ppHI-N1; (2) underline = silent mutation from consensus tPA CDS; three silent mutations were made to tPA CDS to satisfy oligonucleotide synthesis folding conditions; and (3) red GG maintains frame between tPA and pHluorin.

5' Fill Hind3 Kozak Seq 5' tPA >>>

```
-----
CGAGCTC-AAGCTT-GCCGCCACC-ATGGATGCAATGAAGAGAGGGCTCTGCTGTGTGCTGCTGCTGTGTGGAGCAGTCT
TCGTTTCCGCCAGCCAGGAAATCCATGCCCGATTGAGAAGAGGAGCCAGATCTTACCAAGTGATCTGCAGAGATGAAAAA
ACGCAGATGATATACCAGCAACATCAGTCATGGCTGCGCCCTGTGCTCAGAAGCAACCCGGTGAATATTGCTGGTGCAA
CAGTGGCAGGGCAGCTGCCACTCAGTGCCTGTCAAAGTTGCAGCGACCAAGGTGTTCAACGGGGGCACCTGCCAGC
AGGCCCTGACTTCTCAGATTTCTGTGTGCCAGTGCCTCCGAAGGATTTGCTGGGAAGTGTGTGAAATAGATACCAGGGCC
ACGTGCTACGAGGACCAGGGCATCAGTACAGGGGCACGTGGAGCACAGCGGAGAGTGGCGCCGAGTGCACCAACTGGAA
CAGCAGCGCGTTGGCCAGAAGCCCTACAGCGGGCGGAGGCCAGACGCCATCAGGCTGGGCTGCGGGAACCAACTACT
GCAGAAACCAGATCGAGACTCAAAGCCCTGGTGCTACGTCTTTAAGCGGGGAAGTACAGCTCAGAGTTCTGCAGCACC
CCTGCCTGCTCTGAGGGAAACAGTACTGCTACTTTGGGAATGGTCCAGCCTACCGTGGCACGCACAGCCTCACCGAGTC
GGGTGCTCCTGCTCCCGTGAATTCATGATCCTGATAGGCAAGGTTTACACAGCACAGAACCCAGTGCCAGGCAC
TGGGCTGGGCAAACATAATTACTGCCGAATCCTGATGGGATGCCAAGCCITGGTGCCAIGTGCTGAAGAACCCGAGG
CTGACGTGGGAGTACTGTGATGTGCCCTCCTGCTCCACCTGCGGCCTGAGACAGTACAGCCAGCCTCAGTTTCGCATCAA
AGGAGGGCTCTTCGCCGACATCGCTCCACCCCTGGCAGGCTGCCATCTTTGCCAAGCACAGGAGGTGCGCCGGAGAGC
GGTTCCTGTGCGGGGATACTCATCAGCTCCTGTGGATTCTCTCTGCCGCCACTGCTTCCAGGAGAGGTTCCGCC
CACCACCTGACGGTGATCTTGGCAGAACATACCCGGTGGTCCCTGGCAGGAGGAGCAGAAATTTGAAGTCGAAAAATA
CATTGTCCATAAGGAATTCGATGATGACACTTACGACAATGACATTGCGCTGCTGCAGCTGAAATCGGATTCGTCGCT
GTGCCAGGAGAGCAGCGTGGTCCGCACTGTGTGCTTCCCGGGCGGACCTGCAGCTGCCGACTGGACGGAGTGTGAG
CTCTCCGGTACGGCAAGCATGAGGCTTGTCTCCTTTCTATTTCGAGGGGCTGAAGGAGGCTCATGTGACTGTACCC
ATCCAGCCGCTGCACATCACAACATTTACTTAACAGAACAGTACCGCAACATGTGTGTGCTGGAGACTCGGAGCG
GGGGCCCCAGGAAACTTGCACGACGCTGCCAGGGGATTTCGGAGGCCCTGGTGTGTCTGAACGATGGCCGCATG
ACTTTGGTGGGCATCATCAGCTGGGCCTGGCTGTGGACAGAAGGATGTCGGGTGTGTACACCAAGGTTACCAACTA
CCTAGACTGGATTCGTGACAACATGCGACCG-CGG-GAT-CCA-CCG-GTC
```

BamHI

#### gBlock sequence to add a stop codon after tPA in ppHI-N1

Design notes: (1) tPA was moved from ppHI-N1 to pCDNA3.1 with HindIII and BamHI; (2) this construct adds a stop codon (red) to 3' end of tPA CDS; and (3) cut with endogenous BsrGI site (bold) and NotI (green).

5' tPA (position 1496)

```
TTGCACGACGCCTGCCAGGGCGATTCCGGAGGCCCTGGTGTGTCTGAACGATGCCCGCATGACTTTGGTGGGCATCATCAGCTGGGGCCTGGGCT
GTGGACAGAAGGATGTCCCGGTGTGTACCAAGGTTACCAACTACCTAGACTGGATTGTCACAACATGCGACCG-TAG-GGATCCACTAGTCC
```

BsrGI

\*

```
AGTGTGGTGAATTCGCAGATATCCAGCACAGTG-GGGGGGG-TCGAGTCTA
----- 3'
```

NotI

#### gBlock sequence to clone human S513A tPA into ppHI-N1 or pCDNA3 (accession no. NM\_000930.4)

Design notes: (1) GCT (red) = S478A/S513A mutation; (2) adds S513A tPA CDS between HindIII and BamHI sites in ppHI-N1; (3) adds S513A tPA CDS (with stop codon) between HindIII and NotI sites in pCDNA3; (4) underline =

silent mutation from consensus tPA CDS; (5) three silent mutations were made to tPA CDS to satisfy oligonucleotide synthesis folding conditions; (6) red GG maintains frame between tPA and mCherry; and (7) Kozak sequence 3' of tPA is maintained.

5' Fill Hind3 Kozak Seq 5' tPA>>>

```

-----
CGAGCTC-AAGCTT-GCCGCCACC-
ATGGATGCAATGAAGAGAGGGCTCTGCTGTGTGCTGCTGTGTGGAGCAGTCTTCGTTTCGCCAGCCAGGAAATCCA
TGCCCGATTGAGAAGAGGAGCCAGATCTTACCAAGTGATCTGCAGAGATGAAAAACCGCAGATGATATACCAGCAACATC
AGTCATGGCTGGCCCTGTGCTCAGAAGCAACCGGTGGAATATTGCTGGTGCAACAGTGGCAGGGCACAGTGCCACTCA
GTGCTGTCAAAGTTGCAGCGAGCAAGGTGTTTCAACGGGGGCACCTGCCAGCAGGCCCTGTACTTCTCAGATTTCTG
GTGCCAGTCCCCGAAGGATTTGCTGGGAAGTGTGAAATAGATACCAGGGCCACGTGCTACGAGGACCAGGGCATCA
GCTACAGGGGCAGCTGGAGCACAGCGGAGTGGCCGAGTGACCAACTGGAACAGCAGCGCTTGGCCAGAAGCCC
TACAGCGGGCGAGGCCAGACGCCATCAGGCTGGTCTGGGAACCACTACTGCAGAAACCCAGATCGAGACTCAA
GCCCTGGTCTACGCTTTAAGCGGGGAAGTACAGCTCAGAGTTCTGCAGCACCCCTGCCTGCTCTGAGGGAAACAGTG
ACTGTACTTTGGGAATGGTACAGCTACCGTGGCACGACAGCCTACCGAGTCCGGTGCCTCCTGCCTCCCGTGGAAAT
TCCATGATCTGATAGGCAAGTTTTACACAGCACAGAACCCAGTCCCAAGGCACTGGCCCTGGGCAACATAAATTAAGT
CCGGAATCTGATGGGATGCCAAGCCTGGTGGCAAGTGTGCTGAAGAACCGCAGGCTGACGTGGGAGTACTGTGATGTC
CCTCCTGCTCCACCTGGCCCTGAGACAGTACAGCCAGCCTCAGTTTCGCATCAAAGGAGGGCTCTTCGCCGACATCGCC
TCCCACCCCTGGCAGGCTGCCATCTTTCAGCAGCAGAGGTCGCCCGAGAGCGGTTCTGTGCGGGGGCATACTCAT
CAGCTCCTGCTGGATTTCTCTGCGCCCACTGCTTCCAGGAGAGGTTTCCGCCCCACCACCTGACGGTGATCTTGGGCA
GAACATACCGGGTGGTCCCTGGCAGGAGGAGCAGAAATTTGAAGTCGAAAATACATTTGCCATAAGGAATTCGATGAT
GACACTTACGACAATGACATTCGCGTGTGCAGCTGAAATCGGATTCGTCCCCTGTGCCAGGAGAGCAGCGTGGTCCG
CACTGTGTGCTTCCCGGGCGGACCTGCAGCTGCCGACTGGACGGAGTGTGAGCTCTCCGGCTACGGCAAGCATGAGG
CCTTGTCTCCTTCTATTGAGCGGCTGAAGGAGGCTCATGTGACTGTACCCATCCAGCCGCTGCACATCACAACAT
TTACTTAACAGAACAGTACCAGCAACATGCTGTGTGCTGGAGACACTCGGAGCGGGGGCCAGGCAAACTTGCACGA
CGCCTGCCAGGGCGATGCTGGAGGCCCTGTGTGCTGAACGATGGCCGATGACTTTGGTGGGCATCATCAGCTGGG
GCCTGGGCTGTGGACAGAAGGATGTCGCCGGTGTGACACCAAGGTTACCAACTACTAGACTGGATTCTGTGACAACATG
CGACCG-GGG-GAT-CCG-TAG-CCGGCCCG-TTAATTC
R P G D P * -----
          BamHI           NotI

```

gBlock sequence to clone human PAI-1 into pCDNA3 (accession number: NM\_000602.4)

Design notes: (1) Adds PAI CDS between HindIII and BamHI sites in pCDNA3.

US Fill HindIII Kozak Seq 5-PAI>>>

```

-----
CGAGCTC-AAGCTT-GCCGCCACC-
ATGCAGATGTCTCCAGCCCTCACCTGCTAGTCTGGGCTGGCCCTGTCTTTGGTGAAGGGTCTGCTGTGCACCATCCCCATCCTACGTGGCC
ACCTGGCCTCAGACTTCGGGGTGAGGGTGTTCAGCAGGTGGCGCAGGCCCTCAAGGACCGCAACGTGGTTTCTCACCTATGGGGTGGCCTCGGT
GTTGGCCTATGCTCCAGCTGACAACAGGAGGAGAAACCCAGCAGCAGATTCAAGCAGCTATGGGATTCAAGATTGATGACAAGGGCATGGCCCCGGCC
CTCCGGCATCTGTACAAGGAGCTCATGGGCCATGGAACAAGGATGAGATCAGCACCACAGACGCGATCTTCGTCCAGCGGGATCTGAAGCTGGTCC
AGGGCTTCATGCCCCACTTCTCAGGCTGTTCCGGAGCACGGTCAAGCAAGTGGACTTTTTCAGAGTGGAGAGAGCCAGATTATCATCAATGACTG
GGTGAAGACACACAAAAGGTATGATCAGCAACTTGCTTGGGAAAGGAGCCGTGGACCAGCTGACACGGCTGGTCTGGTGAATGCCCTCTACTTC
AACGGCCAGTGGAAAGACTCCCTTCCCGACTCCAGCACCCACCGCCGCTCTTCCACAAATCAGACGGCAGCACTGTCTGTGCCCATGATGGCTC
AGACCAACAAGTTAACTATACTGAGTTCACCACGCCCCGATGGCCATTACTACGACATCCTGGAAGTGCCTACCACGGGGACACCCCTCAGCATGTT
CATTGCTGCCCTTATGAAAAAGAGTGCCTCTCTGCCCTCACCAACATTCTGAGTGGCCAGCTCATCAGCCACTGGAAAGGCAACATGACCAGG
CTGCCCCGCTCCTGGTTCTGCCCAAGTTCTCCCTGGAGACTGAAGTGCACCTCAGGAAGCCCTAGAGAACCTGGGAATGACCCGACATGTTTCAGAC
AGTTTCAGGCTGACTTCACGAGTCTTTCAGACCAAGAGCCTCTCCAGCTCGCGCAGGCGCTGCAGAAAGTGAAGTTCGAGGTGAACGAGAGTGGCAC
GGTGGCCTCCTATCCACAGCTGTATAGTCTCAGCCCGATGGCCCCGAGGAGATCATCATGGACAGACCCCTCTCTTTGGTCCGGCACAAAC
CCCACAGGAACAGTCTTTTTCATGGCCAAGTGTGGAACCC-TAG-GGA-TCC-ACC-GTC
          BamHI

```

gBlock sequence to clone human PAI-1 into ppHI-1 (accession number: NM\_000602.4)

Design notes: (1) The same coding sequence above was used, but without the stop codon to clone into ppHI-N1 using BamHI and HindIII.

US Fill HindIII Kozak Seq 5-PAI>>>

```

-----
CGAGCTC-AAGCTT-GCCGCCACC-
ATGCAGATGTCTCCAGCCCTCACCTGCCTAGTCTCTGGGCTGGCCCTTGTCTTTGGTGAAGGGTCTGCTGTGCACCATCCCCATCCTACGTGGCCC
ACCTGGCCCTCAGACTTCGGGGTGAGGGTGTTCAGCAGGTGGCGCAGGCCCTCAAGGACCGCAACGTGGTTTTCTCACCTATGGGGTGGCCCTCGGT
GTTGGCCATGCTCCAGCTGACAACAGGAGGAGAAACCCAGCAGCAGATTCAAGCAGCTATGGGATTCAAGATTGATGACAAGGGCATGGCCCCGGCC
CTCCGGCATCTGTACAAGGAGCTCATGGGGCCATGGAACAAGGATGAGATCAGCACCACAGACGCGATCTTCGTCCAGCGGGATCTGAAGCTGGTCC
AGGGCTTCATGCCCACTTCTTCAGGCTGTTCCGGAGCACGGTCAAGCAAGTGGACTTTTCAGAGGTGGAGAGCCAGATTATCATCAATGACTG
GGTGAAGACACACAAAAGGTATGATCAGCAACTTGCTTGGGAAAGGAGCCGTGACCAGCTGACACGGCTGGTCTGGTGAATGCCCTCTACTTC
AACGGCCAGTGAAGACTCCCTTCCCGACTCCAGCACCCACCGCCCTCTTCCACAAATCAGACGGCAGCACTGTCTCTGTGCCCATGATGGCTC
AGACCAACAAGTTCAACTATACTGAGTTCACCACGCCCAGTGGCCATTACTACGACATCCTGGAAGTGCCTACCACGGGGACACCCTCAGCATGTT
CATTGCTGCCCCCTTATGAAAAAGAGGTGCCTCTCTGCCCTCACCAACATTCTGAGTGCCAGCTCATCAGCCACTGGAAAAGCAACATGACCAGG
CTGCCCCGCTCTGTTCTGCCAAGTTCTCCCTGGAGACTGAACTCGACCTCAGGAAGCCCTAGAGAACCTGGGAATGACCGACATGTTTCAGAC
AGTTTCAGGCTGACTTCACGAGTCTTTCAGACCAAGAGCCTCTCCACGTCGCGCAGGCGCTGCAGAAAGTGAAGATCGAGGTGAACGAGAGTGGCAC
GGTGGCTCCTCATCCACAGCTGTATAGTCTCAGCCCCATGGCCCCGAGGAGATCATCATGGACAGACCCCTTCTCTTTGGTCCGGCACAAAC
CCCACAGAACAGTCTTTTCATGGCCAAGTATGGAACCC-GGA-TCC-ACC-GTC
-----
      BamHI
  
```

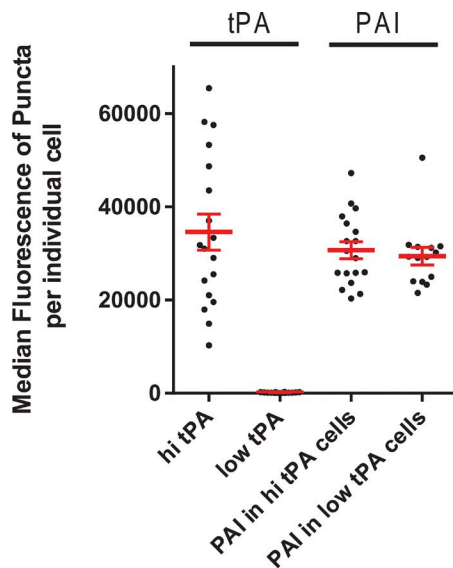

Figure S1. **tPA has no effect on mean PAI immunoreactivity per punctum.** PAI-1 immunofluorescence in puncta from cells with or without tPA-immunoreactivity was quantitated with ImageJ from images from the experiment in Fig. 1. The median PAI-immunofluorescence and tPA-immunofluorescence/punctum was calculated for each cell: high tPA ( $n = 18$  cells) and low tPA ( $n = 14$  cells). Means  $\pm$  SEM are indicated.

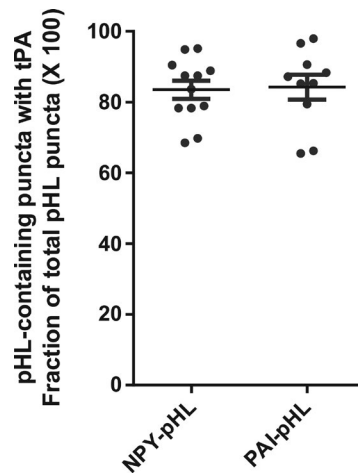

Figure S2. **Coexpression of untagged tPA with PAI-pHL or NPY-pHL.** Cells transfected with DNA encoding PAI-pHL and unlabeled human tPA at a ratio of 1:2 (PAI-pHL:tPA), or NPY-pHL and unlabeled human tPA again at a ratio of 1:2 (NPY-pHL:tPA), were fixed and permeabilized as in Fig. 1. Cells were incubated with rabbit anti-mouse tPA, followed by an Alexa Fluor 546-labeled anti-rabbit secondary antibody, and then imaged by confocal microscopy. PAI-pHL and NPY-pHL fluorescence was imaged directly. Shown are the fractions of pHL-containing puncta that also contain tPA. Each point represents a single cell. Cells and puncta analyzed in each group: transfected NPY-pHL + tPA,  $n = 1,246$  NPY-pHL-containing puncta in 12 cells; transfected PAI-pHL + tPA,  $n = 1,004$  PAI-pHL-containing puncta in 10 cells. In transfected cells expressing NPY-pHL, 84% of granules also overexpressed tPA. In transfected cells expressing PAI-pHL, 85% of PAI-pHL-containing puncta also contained tPA. With respect to total puncta, in cells transfected with NPY-pHL + tPA,  $12.65 \pm 1.99\%$  (mean  $\pm$  SEM) contained NPY-pHL only,  $23.11 \pm 3.12\%$  contained tPA only, and  $64.25\% \pm 3.4\%$  contained both proteins. In cells transfected with PAI-pHL + tPA,  $12.77 \pm 2.76\%$  contained PAI-pHL only,  $17.39 \pm 1.63\%$  contained tPA only, and  $69.85 \pm 3.70\%$  contained both proteins.

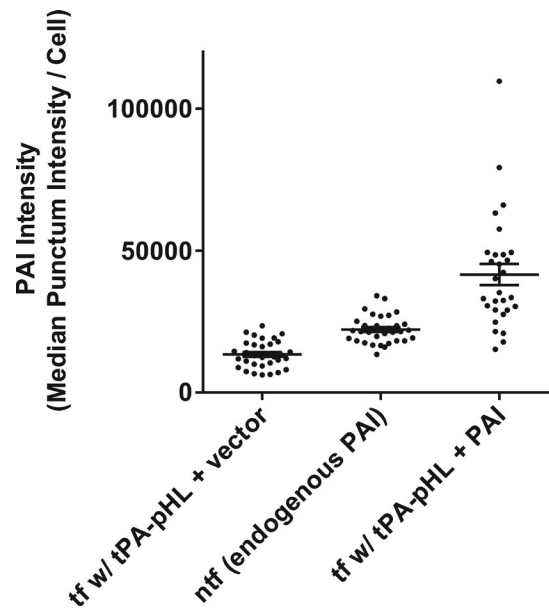

Figure S3. **Extent of PAI overexpression: transfected versus endogenous PAI.** Cells transfected with DNA encoding tPA-pHL and either unlabeled human PAI or empty vector (1:2 ratio) were fixed and permeabilized as in Fig. 1. Cells were incubated with rabbit anti-human PAI-1, followed by an Alexa Fluor 546-labeled anti-rabbit secondary antibody, and then imaged by confocal microscopy. tPA-pHL was imaged directly. Shown are the median intensities per cell of PAI immunofluorescence, each point representing one cell, with mean  $\pm$  SEM indicated for the group. PAI fluorescence in cells with empty vector (endog. PAI) and tPA-pHL  $13,437 \pm 858$ ; PAI fluorescence in nontransfected cells (endogenous PAI)  $22,172 \pm 867$ ; PAI fluorescence in cells transfected with untagged PAI + tPA-pHL  $41,555 \pm 3,703$ . Cells and puncta analyzed in each group: transfected tPA-pHL with endogenous PAI,  $n = 1,934$  puncta in 32 cells; nontransfected cells, endogenous PAI,  $n = 1,492$  puncta in 32 cells; transfected tPA-pHL + transfected human PAI,  $n = 2,135$  puncta in 29 cells.

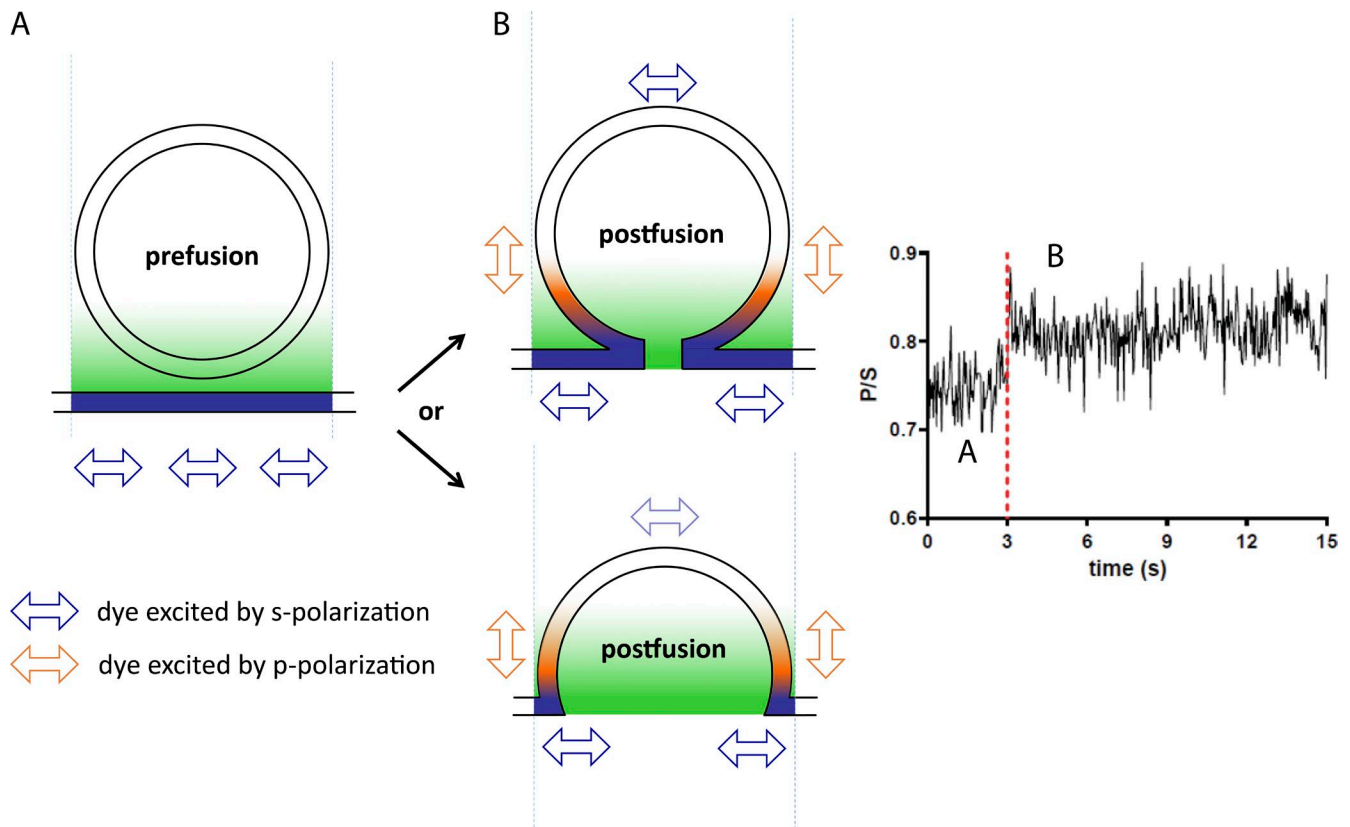

Figure S4. **Illustration of the  $P/S$  response after secretory granule fusion in pTIRFM.** The transition dipole moment of lipophilic dye DiD is oriented as indicated by the arrowheads and by color (blue, S-polarized dye; orange, P-polarized dye). The schematic is oriented along the  $y$ - $z$  plane; S-polarized dye is oriented along the  $y$  axis, and P-polarized dye is oriented along the  $z$  axis. The green gradient depicts the rapidly decaying evanescent field. Prefusion (A), the transition dipole moment of DiD in the plasma membrane is oriented parallel to the glass interface. Postfusion (B), membrane curvature increases the amount of DiD with its transition dipole moment oriented perpendicularly to the glass interface. Thus, the  $P/S$  ratio increases when a membrane is curved within a region of interest. The increase occurs for both narrow-neck and wide-neck fusion pores. An example is shown on the right of a long-lived fusion pore resulting from the fusion of a tPA-pHl-containing granule.

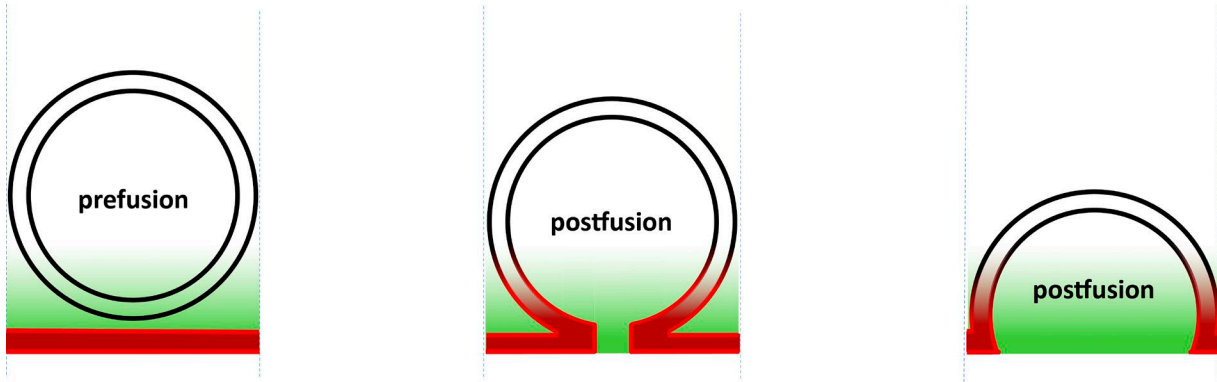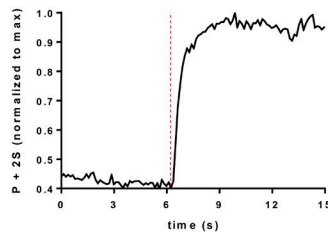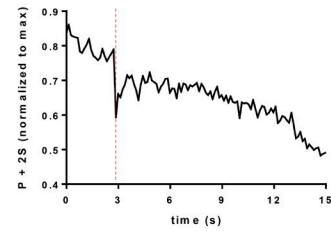

**Prefusion**

Baseline fluorescence from DiD-labeled plasma membrane

**Narrow fusion pore**

More fluorescent membrane within the region with highest evanescent field excitation. P + 2S increase.

**Wide fusion pore**

Less fluorescent membrane within the region with highest evanescent field excitation. P + 2S decrease.

Figure S5. Illustration of the  $P + 2S$  response after secretory granule fusion in pTIRF. The figure shows a schematic along the  $y$ - $z$  plane; S-polarized dye is oriented along the  $y$  axis, and P-polarized dye is oriented along the  $z$  axis. The extent of the rapidly decaying evanescent field is indicated by the green gradient within blue dotted lines that indicate a region of interest. The fluorescence of the DiD-labeled membrane is indicated by red coloration. A narrow fusion pore neck (left) will have more membrane close to the glass interface in a region of high evanescent field excitation compared with before fusion. Thus, a narrow fusion pore will increase the total amount of DiD ( $P+2S$ ) within the region of interest that is excited by the evanescent field. In contrast, a wide fusion pore will have less membrane in the region of high evanescent field excitation compared with before fusion. Thus, a wide fusion pore will decrease the total amount of membrane labeled with DiD ( $P+2S$ ) that is excited by the evanescent field. Examples of fusion pores resulting in an increase in  $P+2S$  (left, fusion of a granule containing PAI-pHL + unlabeled tPA resulting in a long-lived fusion pore) and a decrease in  $P+2S$  (right, fusion of a PAI-pHL-containing granule without tPA with a short-lived fusion pore).
